# Supplementary material for: Synthesis and unprecedented oxidation of a cationic Sb-analogue of an Arduengo's carbene
Source: Royal Society of Chemistry journal article supplement (doi:10.1039/b409657f), 2004-01-01
Supplement: b409657f.doc [file b409657f.doc]

Synthesis and Unprecedented Oxidation of a Cationic Sb-Analogue of an Arduengo’s Carbene

Dietrich Gudat,**a* Timo Gans-Eichler*b* and Martin Nieger*b*

a Institut für Anorganische Chemie, Universität Stuttgart, 70550 Stuttgart, Germany. Fax: +49 711 685 4241; E-mail: gudat@iac.uni-stuttgart.de

b Institut für Anorganische Chemie, Universität Bonn, Germany.

**Supplementary Information**: Experimental procedures and comprehensive physical data for **2a,b**, **3a**[X], [(**7a**)SbCl3)2], and details on computational studies of the model compounds **3c**[SbCl6], [(**7c**)SbCl3)2].

**General Remarks**: All manipulations were carried out under dry argon. Solvents were dried by standard procedures. NMR spectra: Bruker AMX300 (1H: 300.1 MHz, 13C: 75.4 MHz, 15N: 30.4 MHz, 27Al 78.2 MHz); chemical shifts refer­enced to ext. TMS (1H, 13C), MeNO2 ( = 10.136767 MHz, 15N), aq. Al(NO3)3 ( = 26.056859, 27Al); positive signs denote shifts to lower frequen­cies, and coupling constants are given as absolute values; prefixes i-, o-, m-, p- denote atoms of mesityl substituents. - MS: VG-Instruments VG 12-250. - FT-IR spectra: Bruker IFS 113V. Raman spectra: Bruker RFS 100. - Ele­mental ana­lyses: Heraeus CHNO-Rapid. Melting points were de­ter­mined in sealed capillaries.

**Experimental procedure and physical data for 2a:**

A solution of 18.2 mmol (4.15 g) of ­SbCl3 was added dropwise to a solution of 16.6 mmol (3.5 g) of the adduct **1a**·LiCl 1 and 36.6 mmol (3.7 g) NEt3. The red to black solution was stirred for 45 min at 50°C. After removal of the volatiles in vacuum, the residue was extracted with 20 ml of hexanes, and filtered. The orange-red filtrate was concentrated and stored overnight at –30°C. The precipitate of orange-red crystals were separated from the mother liquor by decantation and dried in vacuum to yield 2.2g (41%) of product, mp. 90°C (dec.). Elemental analysis: calcd. for C10H20N2SbCl C 36.9 H 6.15 N 8.62, found C 37.0 H 6.53 N 8.45

1H NMR (C6D6):  = 6.6 (s, 2,H, CH), 1.25 (s, 18 H, tBu). – 13C{1H} NMR (C6D6):  = 119.5 (=CH), 55.2 (*C*(CH3)3), 30.8 (C(*C*H3)3). – 15N{1H} NMR (C6D6):  = –208.9. MS (EI, 16eV, 150°C): m/e (%) = 324 (85) [M+], 289 (85) [M+-Cl], 232 (50) [M+-Cl, -C4H9]. – Raman spectrum (powder):`n = 150, 299, 396, 569, 690, 968, 1220, 1262, 1569, 2868, 2905, 2972, 3058 cm-1. – IR spectrum (KBr):`n = 3047(w), 2955(vs), 1562(w), 1458(s), 1386(s), 1386(vs), 1255(vs), 1145(m), 1058(m), 964(m), 829(m), 686(s), 484 (s) cm-1.

Alternatively, **2a** was accessible by the procedure described below for **2b**.

**Experimental procedure and physical data for 2b:**

A solution of 20 mmol (5.88 g) of **1b** 1 in 20ml of toluene was cooled to–78°C, and 20 mmol (4.91 g) of ClSb(NMe2)2, dissolved in 20 ml of toluene, were added. The reaction mixture was slowly warmed to–40 °C and evolving Me2NH was released through a bubble counter. When the reaction mixture turned red, it was further warmed to 40°C and stirring continued for 60 – 90 min. until the colour turned black. The solution was filtered and concentrated, layered with 15 ml of ether, and stored 1-2 days at –30°C. The orange to ochre solid was separated from the mother liquor by decantation, and dried in vacuum to give 4.2 g (47%) of product, mp. 80° C (dec). Elemental analysis: calcd. for C20H24N2SbCl C 53.43 H 5.38 N 6.23, found C 53.2 H 5.5 N 6.1

1H NMR (C6D6):  = 6.79 (s, 4 H, *m-*H), 6.38 (s, 2 H, CH), 2.29 (s, 12 H, *o*-CH3), 2.13 (s, 6 H, *p*-CH3). – 13C{1H} NMR (C6D6):  = 140.1 (*p-*C), 134.8 (*i*-C), 134.0 (*o*-C), 128.2 (*m*-C), 124.8 (=CH), 19.5 (*o*-CH3), 17.6 ( *p*-CH3). – 15N{1H} NMR (C6D6):  = –219.5. – MS (EI): m/e (%) = 448 (20) [M+], 413 (16) [M+-Cl], 277 (100) [M+ –SbCl, –CH3].

**Experimental procedure and physical data for 3a[AlCl4]:**

A suspension of 1.55 mmol (210mg) of AlCl3 in 10 ml of ether was added dropwise to a stirred solution of 1.55 mmol (500 mg) of **2a** in 20 ml of ether. A yellow precipitate formed immediately. After the stirring was continued for 1 h, the precipitate was collected by filtration, washed with ether and dried in vacuum. The crude product was recrystallised from CH3CN to give 500 mg (73%) of yellow crystals of **3a**[AlCl4], mp. 180°C (dec.).

1H NMR (CD2Cl2):  = 8.57 (s, 2 H, CH), 1.78 (s, 18 H, C(CH3)3). ). – 13C{1H} NMR (CD2Cl2):  = 137.9 (=CH), 62.4 (*C*(CH3) 3), 32.0 (C(*C*H3) 3). – 15N{1H} NMR (CD3CN):  = –91.8. – 27Al NMR (CD3CN):  = 105.2. – IR (nujol):`n = 491(s), 518(w), 678(w), 722(w), 1191(m), 1205(m), 1509(m), 3089 (w); 3104(w) cm-1. IR (polyethylene):`n = 491(s), 377(m), 182(m), 177(m) cm-1. – Raman (powder):`n = 121, 130, 165, 188, 233, 287, 347, 391; 479, 563, 679, 796, 923, 951, 1038, 1136, 1225, 1442, 1472, 1509, 2910, 2982, 3104 cm-1.

**Experimental procedure and physical data for 3a[GaCl4]:**

The reaction of 1 mmol (330 mg) of **2a** and1 mmol (180 mg) GaCl3 was carried out as described above, to give 350 mg (70%) of **3a**[GaCl4] as yellow crystals of mp. 190°C (dec.). Elemental analysis: calcd. for C10H20Cl4GaN2Sb C 23.95 H 4.02 N 5.59; found C 23.97 H 4.04 N 5.47.

1H NMR (CD3CN):  = 8.49 (s, 2 H, CH), 1.70 (s, 18 H, C(CH3)3). – 13C{1H} NMR (CD3CN):  = 136.2 (=CH), 62.5 (*C*(CH3)3), 31.5 (C(*C*H3)3). – 15N{1H} NMR (CD3CN):  = –102.2. – IR (nujol):`n = 518(w), 678(w), 722(w), 770(m), 1205(m), 1509(m), 3089(m), 3103 (m) cm-1. – IR (polyethylene):`n = 478, 430, 375, 286, 188, 150 cm-1. – Raman (powder):`n = 123, 150, 188, 233, 287, 344; 369; 375, 391, 563, 678, 795, 922, 950, 1036, 1135, 1224, 1444, 1471, 1508, 2909, 2981, 3103 cm-1.

**Experimental procedure and physical data for 3a[SbCl4]:**

The reaction of 2 mmol (650 mg) of **2a** and2 mmol (460 mg) SbCl3 was carried out as described above, to give 560 mg (51%) of **3a**[SbCl4] as yellow crystals of mp. 130°C (dec.).

1H NMR (CD3CN):  = 8.57 (s, 2 H, CH), 1.71 (s, 18 H, C(CH3)3). – 13C{1H} NMR (CD3CN):  = 136.9 (=CH), 62.7 (*C*(CH3)3), 31.5 (C(*C*H3)3). – 15N{1H} NMR (CD3CN):  = –94.5. – IR (nujol):`n = 515(w), 668(w), 722 (w), 774(w), 1191(m), 1224(m), 1512 (w), 3096 (w) cm-1. – IR (polyethylene):`n = 343(m), 290(m), 241(w) cm-1. – Raman (powder):`n = 187, 235, 343, 292, 243, 564, 951, 1513, 2973, 3098 cm-1.

**Experimental procedure and physical data for 3a[SO3CF3]:**

3.5 mmol (780 mg) of Me3SiOSO2CF3 were added dropwise to a stirred solution of 3.5 mmol (1.14 g) of **2a** in 20 ml of ether. After stirring was continued for 1 h, the yellow precipitate formed was filtered off, washed with ether, and dired in vacuum. Recrystallisation from acetonitrile/ether afforded 1.10 g (72%) of product as yellow crystals of mp. 180°C (dec.).

1H NMR (CD2Cl2):  = 8.62 (s, 2 H, CH), 1.78 (s, 18 H, C(CH3)3). – 13C{1H} NMR (CD2Cl2):  = 138.5 (=CH), 63.4 (*C*(CH3)3), 33.3 (C(*C*H3)3). – 15N{1H} NMR (CD3CN):  = –84.5. – IR (nujol):`n = 515(m), 639(s), 1147(m), 1195(w), 1223(m), 1512(w), 3083(vw) cm-1. – IR (polyethylene):`n = 193(m); 208(m), 295(m), 346(m), 379(s), 448(w) cm-1. – Raman (powder):`n = 168, 194, 290, 310, 346, 393, 569, 684, 754, 800, 954,1025, 1139, 1220, 1476, 1512 cm-1.

**Experimental procedure and physical data for 3b[SO3CF3]:**

The reaction of 5 mmol (2.25 g) of **2a** and5 mmol (1.11 g) of Me3SiOSO2CF3 was carried out as described above, to give 2.00 g (71%) of **3b**[SO3CF3] as yellow crystals of mp. 185°C (dec.).

1H NMR (CD3CN):  = 8.41 (s, 2 H, CH), 7.17 (s, 4 H, *m-*H), 2.40 (s, 12 H, *o*-CH3), 2.20 (s, 6 H, *p*-CH3). – 13C{1H} NMR (C6D6):  = 142.7 (*p-*C), 140.6 (*i*-C), 138.3 (*o*-C), 132.5 (=CH), 128.8 (*m*-C), 19.7 (*o*-CH3), 15.4 ( *p*-CH3).

**Experimental procedure for [(7a)(SbCl3)2]:**

(a) A solution of 1 mmol (460 mg) of **3a**[AlCl4]in 10 ml of CH2Cl2 was exposed to an atmosphere of dry air. Storing the solution for several days at –30°C produced a white amorphous precipitate that was not analysed further, and yellow crystals of the adduct [(**7a**)(SbCl3)2] which were characterised by single-crystal X-ray diffractommetry and Raman spectroscopy (characteristic bands:`n = 3027, 2990, 2980, 1911, 1588, 1466, 1234, 326, 289, 151 cm-1). The 1H NMR spectrum displayed only the signals of the diazadiene **7a**.
(b) A solution of 2 mmol (600 mg) of SbCl5 in 5 ml of ether was added dropwise to a stirred solution of 2 mmol (650 mg) of **2a** in 10 ml of ether. A yellow precipitate formed immediately but redissolved when the addition of SbCl5 was complete. Storage of the reaction mixture produced a yellow microcrystalline precipitate whose 1H NMR and Raman spectra were identical to those of [(**7a**)(SbCl3)2] produced by air oxidation of **3a**[AlCl4]. Isolation of the initially formed precipitate was feasible when the addition of SbCl5 was interrupted after half an equivalent had been added. The solid was collected by filtration and identified as **3a**[SbCl4] by comparison of the 1H NMR and Raman spectra with those of an authentic sample. The diazadiene **7a** formed by reduction of SbCl5 was detected by 1H NMR spectroscopy in the filtrate.

**Computational Studies**

DFT calculations (B3LYP) were carried out with the Gaussian 98 program package 2 using the SDD basis set augmented by one set of polarisation functions on all heavy atoms. The basis set employs a D95V split-valence basis set for C, H, N, and Cl atoms, and Stuttgart/Dresden ECPs at Sb. Harmonic vibrational frequencies and zero-point vibra­tional energies (ZPE) were calculated at the same level. Both structures reported here are min­ima on the potential energy surface (only positive eigenvalues of the Hessian matrix).

**Table 1: Results of computational studies on [(3c)(SbCl6)]**

|  | | | |
| --- | --- | --- | --- |
| Symmetry | Cs | | |
| Energy: | -3038.95226973 a.u. | | |
| (rel. energy) | 34.4 kcal mol-1 | | |
| zero-point energy | 0.129330 a.u. | | |
|  | | | |
| Atomic coordinates (in Å) | | | |
| Atom | x | y | z |
| Sb1 | 0.665164 | -1.916280 | 0.000000 |
| Cl2 | 0.637571 | -3.536295 | 1.755661 |
| Cl3 | 0.637571 | -3.536295 | -1.755661 |
| Cl4 | 3.064557 | -1.774483 | 0.000000 |
| Cl5 | 0.637571 | -0.069412 | -1.710157 |
| Cl6 | -1.768997 | -1.770159 | 0.000000 |
| Cl7 | 0.637571 | -0.069412 | 1.710157 |
| Sb8 | -1.206498 | 1.973062 | 0.000000 |
| N9 | -2.164847 | 3.804794 | 0.000000 |
| N10 | 0.369007 | 3.274328 | 0.000000 |
| C11 | -3.618301 | 4.011085 | 0.000000 |
| C12 | -1.332216 | 4.881238 | 0.000000 |
| C13 | 0.020103 | 4.591526 | 0.000000 |
| C14 | 1.802490 | 2.925995 | 0.000000 |
| H15 | -3.929963 | 4.567491 | 0.892979 |
| H16 | -4.135033 | 3.045598 | 0.000000 |
| H17 | -3.929963 | 4.567491 | -0.892979 |
| H18 | 2.282394 | 3.336858 | 0.896734 |
| H19 | 1.930271 | 1.843707 | 0.000000 |
| H20 | 2.282394 | 3.336858 | -0.896734 |
| H21 | -1.729130 | 5.893538 | 0.000000 |
| H22 | 0.796141 | 5.352569 | 0.000000 |

**Table 2: Results of computational studies on [(7c)(SbCl3)2]**

|  | | | |
| --- | --- | --- | --- |
| Symmetry | C1 | | |
| Energy: | -3039.00704826 a.u. | | |
| (rel. energy) | 0.0 kcal mol-1 | | |
| zero-point energy | 0.126674 a.u. | | |
|  | | | |
| Atomic coordinates (in Å) | | | |
| Atom | x | y | z |
| Sb1 | -2.515612 | -0.029628 | 0.082350 |
| Cl2 | -4.450474 | 0.037704 | -1.344533 |
| Cl3 | -3.313127 | -1.718687 | 1.595314 |
| Cl4 | -3.079508 | 1.869916 | 1.439204 |
| Cl5 | 0.908102 | -0.014063 | 1.392852 |
| Sb6 | 1.897472 | -0.046571 | -0.829107 |
| Cl7 | 0.391456 | 1.774048 | -1.577610 |
| Cl8 | 0.542150 | -2.020587 | -1.450329 |
| N9 | 3.770607 | -1.322976 | 0.631330 |
| N10 | 3.633372 | 1.499279 | 0.533982 |
| C11 | 3.841492 | -2.772045 | 0.736327 |
| C12 | 4.654347 | -0.589528 | 1.195560 |
| C13 | 4.581347 | 0.895734 | 1.145707 |
| C14 | 3.559831 | 2.951930 | 0.541690 |
| H15 | 4.714346 | -3.125059 | 1.304664 |
| H16 | 3.859891 | -3.203731 | -0.272280 |
| H17 | 2.920525 | -3.126112 | 1.216647 |
| H18 | 3.541871 | 3.314886 | -0.493604 |
| H19 | 2.604840 | 3.243795 | 0.996681 |
| H20 | 4.389557 | 3.426705 | 1.085367 |
| H21 | 5.495137 | -1.016436 | 1.760596 |
| H22 | 5.372846 | 1.439832 | 1.680388 |

**References:**

1. T. Gans-Eichler, D. Gudat, M. Nieger, *Angew. Chem. Int. Ed. Engl*. 2002, **41**, 1888.
2. Gaussian 98 (Rev. A.7), M. J. Frisch, G. W. Trucks, H. B. Schlegel, G. E. Scuseria, M. A. Robb, J. R. Cheeseman, V.G. Zakrzewski, J. A. Montgomery, R. E. Stratmann, J. C. Burant, S. Dapprich, J. M. Millam, A. D. Daniels, K. N. Kudin, M.C. Strain, O. Farkas, J. Tomasi, V. Barone, M. Cossi, R. Cammi, B. Mennucci, C. Pomelli, C. Adamo, S. Clif­ford, J.Ochterski, G. A. Petersson, P. Y. Ayala, Q. Cui, K. Morokuma, D. K. Malick, A. D. Rabuck, K. Raghavachari, J. B.Foresman, J. Cioslowski, J. V. Ortiz, B. B. Stefanov, G. Liu, A. Liashenko, P. Piskorz, I. Komaromi, R. Gomperts, R. L.Martin, D. J. Fox, T. Keith, M. A. Al-Laham, C. Y. Peng, A. Nanayakkara, C. Gonzalez, M. Challacombe, P. M. W. Gill, B.G. Johnson, W. Chen, M. W. Wong, J. L. Andres, M. Head-Gordon, E. S. Replogle and J. A. Pople, Gaussian, Inc., Pittsburgh PA, 1998.
